# Supplementary material for: Highly Selective, Aptamer-Based, Ultrasensitive Nanogold Colorimetric Smartphone Readout for Detection of Cd(II)
Source: PubMed Central journal article supplement (PMC6695641; doi:10.3390/molecules24152745), 2019-07-29
Supplement: molecules-24-02745-s001.pdf [file molecules-24-02745-s001.pdf]

## Electronic Supplementary Information

# Highly Selective Aptamer Based Ultrasensitive Nanogold Colorimetry-Smartphone Readout for Detection of Cd (II)

Lu Xu<sup>1,2</sup>, Jun Liang<sup>2</sup>, YongHui Wang<sup>1</sup>, ShuYue Ren<sup>1</sup>, Jin Wu<sup>1</sup>, HuanYing Zhou<sup>1,\*</sup>, and Zhixian Gao<sup>1,\*</sup>

<sup>1</sup> Tianjin Key Laboratory of Risk Assessment and Control Technology for Environment and Food Safety, Tianjin Institute of Environmental & Operational Medicine, Tianjin, 300050, China

<sup>2</sup> State Key Laboratory of Food Nutrition and Safety, Tianjin University of Science and Technology, Tianjin, 300222, China

\* Correspondence: zhouhytj@163.com; gaozhx@163.com.; Tel.: +86-022-84655191

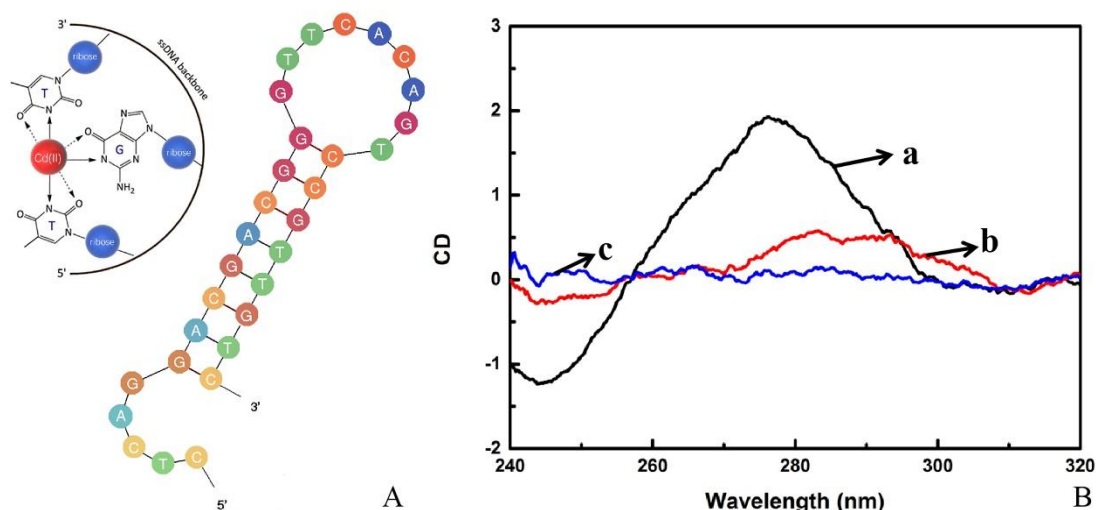

Figure S1 (A) Secondary structure of Cd (II) aptamer predicted using Mfold software. The part marked with red line had folded into a stem-loop structure. (B) CD spectra of (a) 10  $\mu$ M aptamer solutions, (b) 10  $\mu$ M aptamer and 50  $\mu$ g/mL Cd (II) solution, (c) 50  $\mu$ g/mL Cd (II) solution.

**Table S1.** Detection of Cd (II) in rice and drinking water

| Method                 | Rice(mg/kg) | Water(ng/mL) |
|------------------------|-------------|--------------|
| Nation Standard method | 0.488       | 15.969       |
| This method            | 0.455       | 15.200       |
